# Supplementary material for: Simultaneous Quantification of Ivacaftor, Tezacaftor, and Elexacaftor in Cystic Fibrosis Patients’ Plasma by a Novel LC–MS/MS Method
Source: MDPI journal article supplement (doi:10.3390/biomedicines11020628), 2023-02-20

**SUPPLEMENTARY MATERIALS**

**Supplementary Figure S1:** Stability at room temperature (RT) of Tezacafor, Elexacaftor and Ivacaftor on five real samples (mg/L).

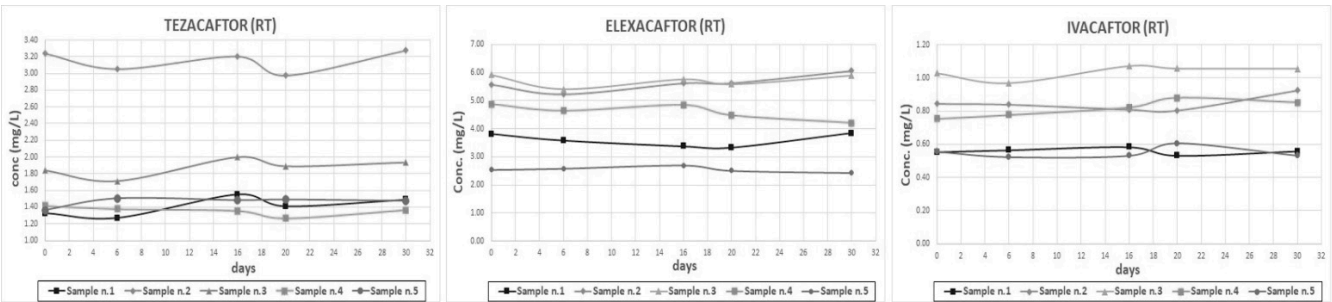

**Supplementary Figure S2:** Stability at + 4°C of Tezacafor, Elexacaftor and Ivacaftor on five real samples (mg/L).

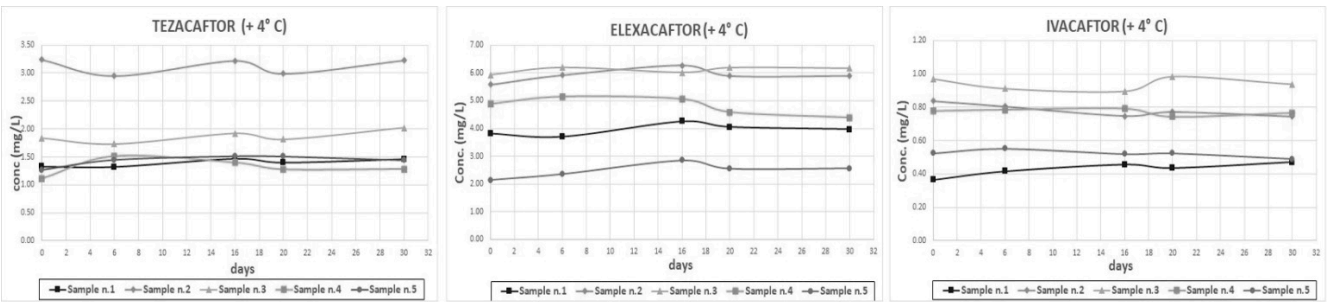

**Supplementary Figure S3:** Stability at -80°C of Tezacafor, Elexacaftor and Ivacaftor on five real samples (mg/L).

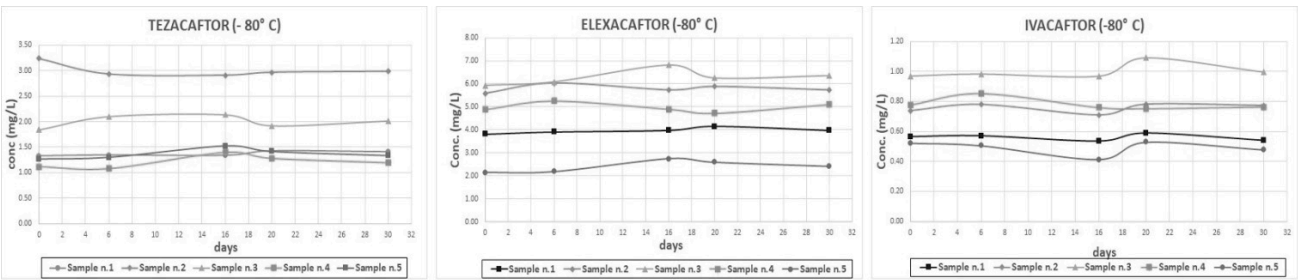

**Supplementary Figure S4:** The scatter plot between Cthrough of TEZ and sweat test.

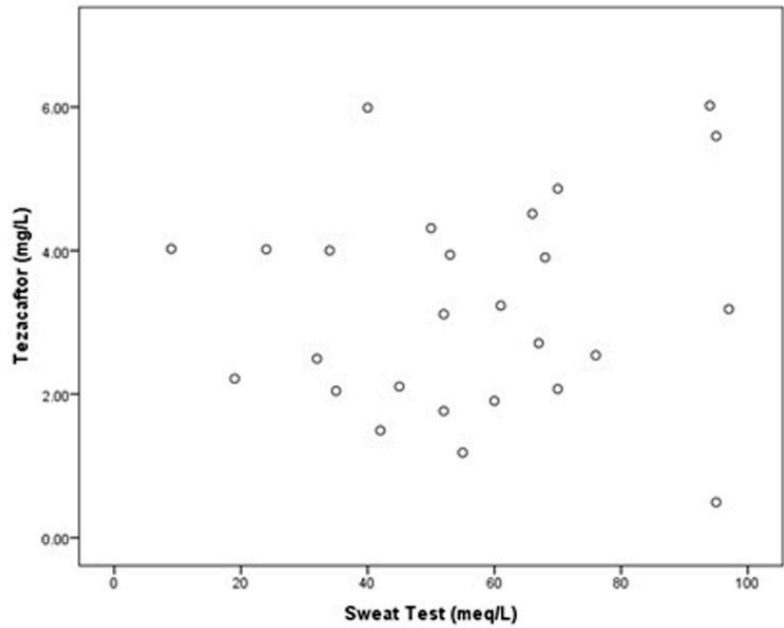

**Supplementary Figure S5:** The scatter plot between Cthrough of TEZ and FEV1 (%).

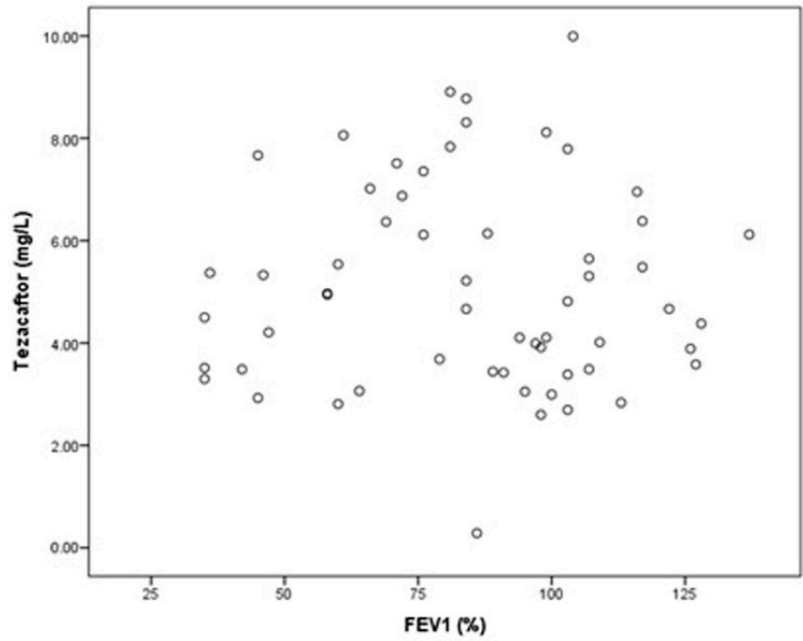

**Supplementary Figure S6:** The scatter plot between Cthrough of TEZ and BMI.

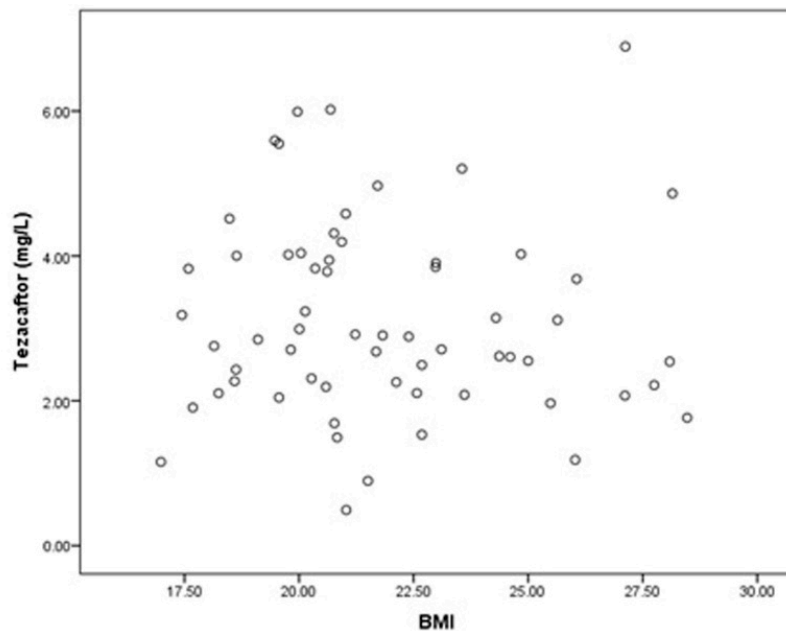

**Supplementary Figure S7:** The scatter plot between Cthrough of ELX and sweat test.

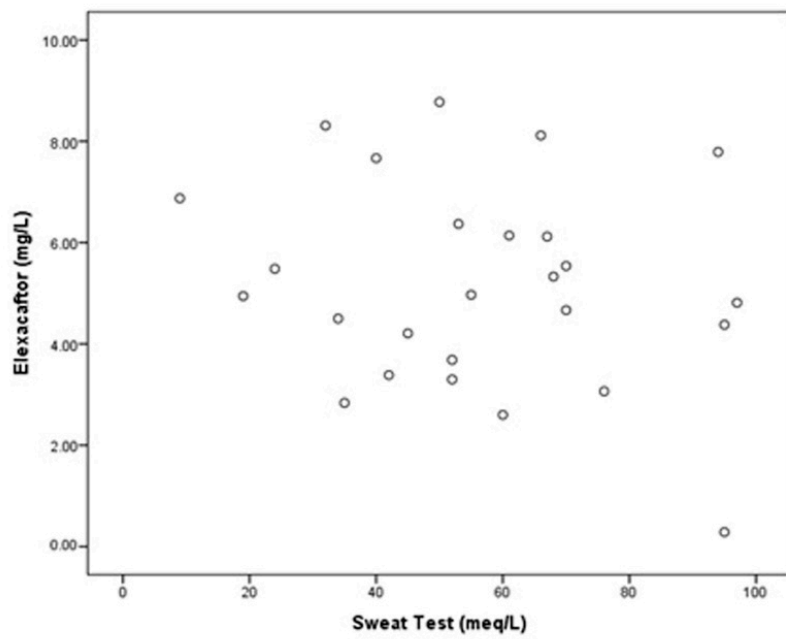

**Supplementary Figure S8:** The scatter plot between Cthrough of ELX and FEV1 (%).

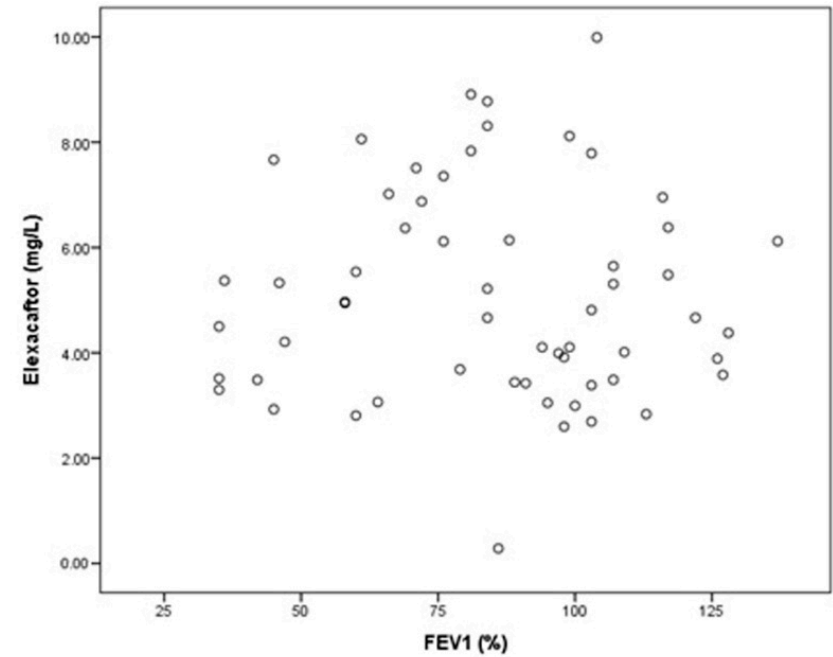

**Supplementary Figure S9:** The scatter plot between Cthrough of ELX and BMI.

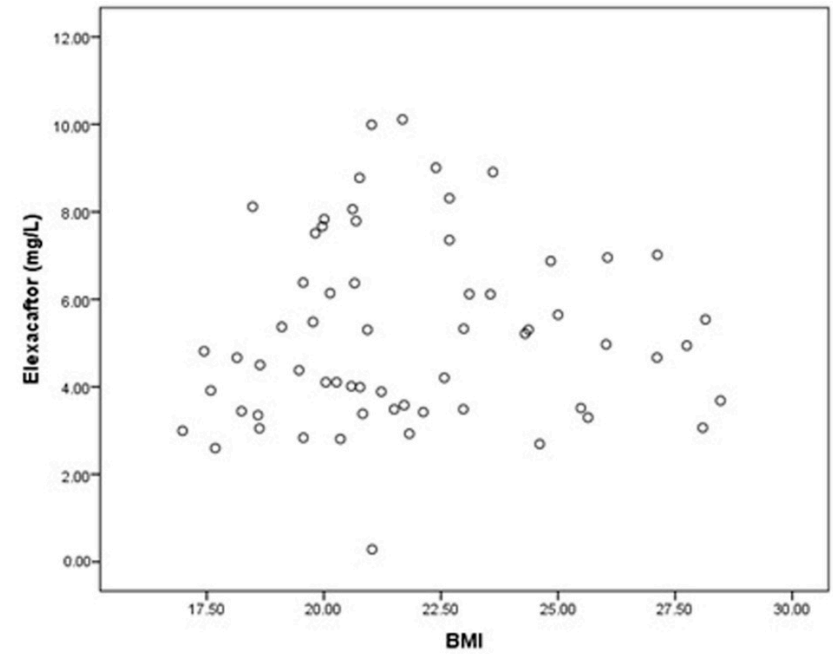

**Supplementary Figure S10:** The scatter plot between Cthrough of IVA and sweat test.

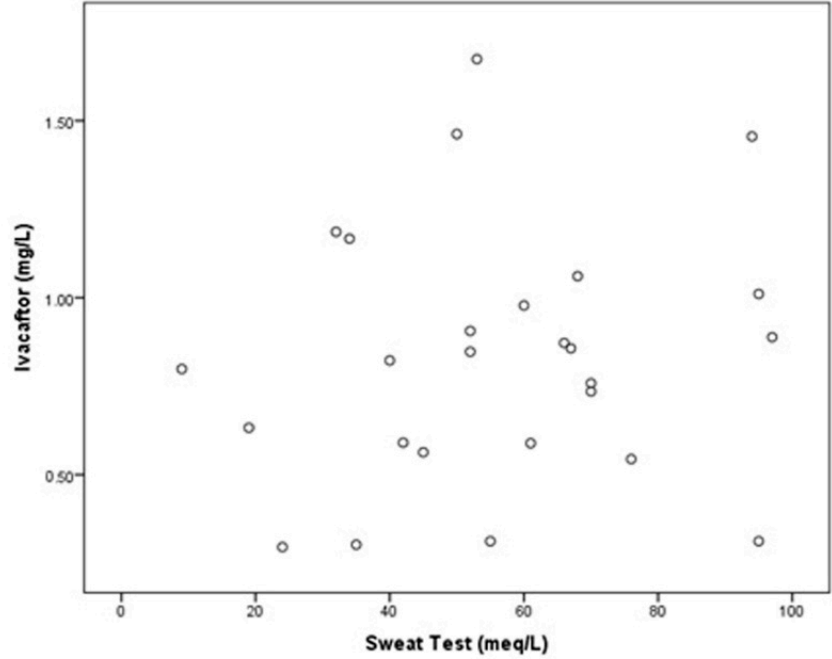

**Supplementary Figure S11:** The scatter plot between Cthrough of IVA and FEV1 (%).

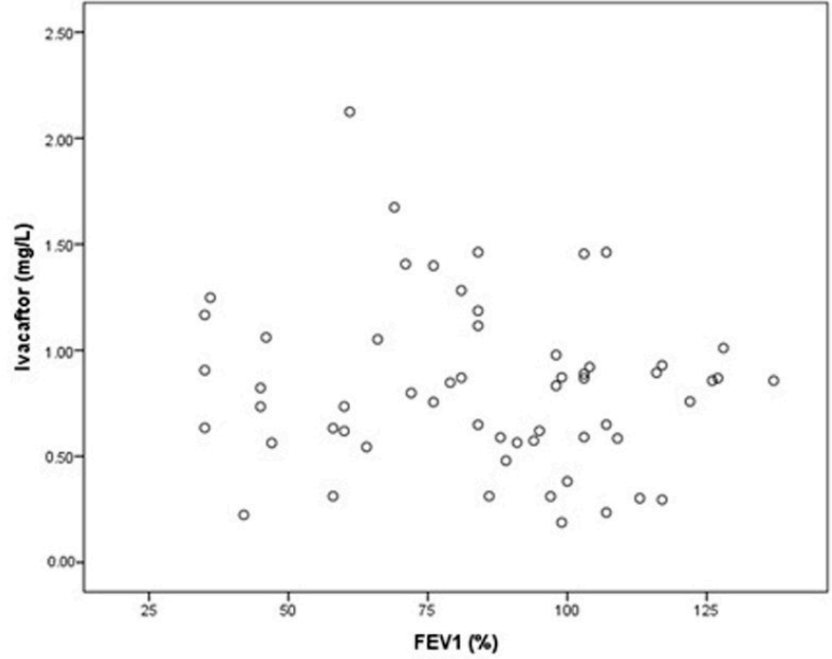

**Supplementary Figure S12:** The scatter plot between Cthrough of IVA and BMI.

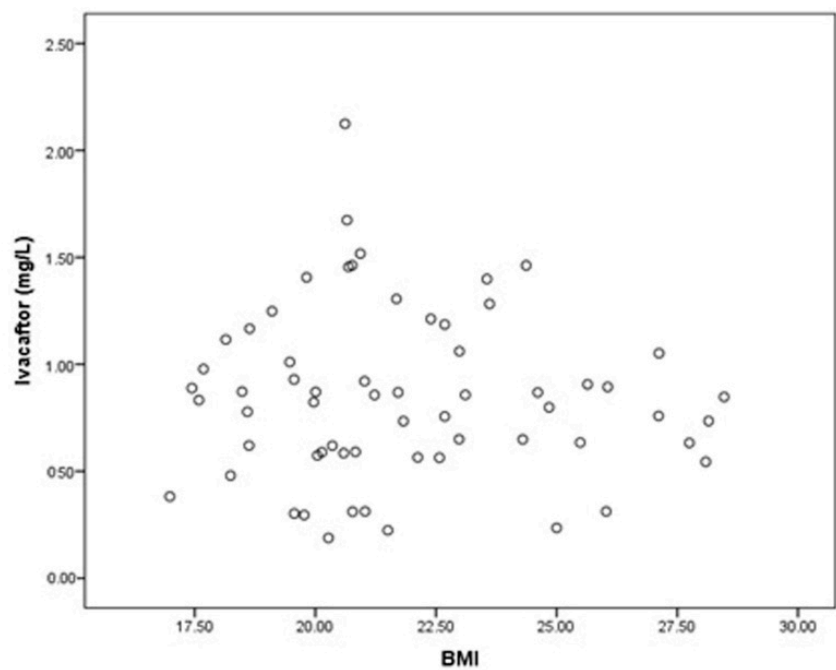

Supplement: s1 [file s1]
